# Supplementary material
Source: HighWire-hosted journal article supplement (https://rmdopen.bmj.com/content/8/1/e002086)

## Supplemental figure S1

A

|                    |                       | Eosinophilic<br>Granulomatosis<br>with Polyangiitis<br>(n=13) | IgG4-related<br>disease<br>(n=20) | Microscopic<br>Polyangiitis<br>(n=26) | P value |
|--------------------|-----------------------|---------------------------------------------------------------|-----------------------------------|---------------------------------------|---------|
| CD4 T cells        | Naive                 | 50.1 ± 15.0                                                   | 34.7 ± 14.0                       | 46.9 ± 2.9                            | 0.01    |
|                    | Central memory        | 35.3 ± 10.5                                                   | 42.9 ± 11.4                       | 30.7 ± 2.4                            | 0.01    |
|                    | Effector memory       | 12.3 ± 9.2                                                    | 17.3 ± 6.9                        | 17.6 ± 1.7                            | 0.17    |
|                    | Effector              | 2.3 ± 1.7                                                     | 4.9 ± 3.7                         | 5.8 ± 1.2                             | 0.25    |
|                    | Activated             | 14.4 ± 8.1                                                    | 7.3 ± 3.7                         | 11.2 ± 1.6                            | 0.04    |
| CD8 T cells        | Naive                 | 50.5 ± 21.2                                                   | 34.6 ± 19.1                       | 29.1 ± 3.4                            | <0.01   |
|                    | Central memory        | 15.6 ± 8.0                                                    | 14.7 ± 12.8                       | 18.8 ± 2.3                            | 0.5     |
|                    | Effector memory       | 13.4 ± 11.6                                                   | 16.2 ± 10.9                       | 27.5 ± 2.7                            | 0.01    |
|                    | Effector              | 20.6 ± 17.2                                                   | 34.5 ± 22.3                       | 24.6 ± 3.5                            | 0.09    |
|                    | Activated             | 25.7 ± 15.8                                                   | 10.5 ± 5.1                        | 22.6 ± 2.4                            | <0.01   |
| CD4 T cell subsets | Th1                   | 21.3 ± 7.4                                                    | 21.8 ± 7.4                        | 17.7 ± 1.4                            | 0.12    |
|                    | Activated Th1         | 5.2 ± 5.1                                                     | 1.9 ± 1.2                         | 6.7 ± 3.1                             | 0.59    |
|                    | Th17                  | 10.6 ± 5.0                                                    | 14.0 ± 5.6                        | 12.9 ± 1.1                            | 0.23    |
|                    | Activated Th17        | 2.3 ± 1.8                                                     | 1.1 ± 0.8                         | 1.4 ± 0.2                             | 0.02    |
|                    | Treg                  | 4.6 ± 3.0                                                     | 5.7 ± 1.9                         | 4.6 ± 0.4                             | 0.15    |
|                    | Activated Treg        | 2.1 ± 2.1                                                     | 1.8 ± 0.7                         | 1.8 ± 0.2                             | 0.69    |
|                    | Naive Treg            | 1.1 ± 1.5                                                     | 1.4 ± 0.7                         | 0.6 ± 0.2                             | 0.02    |
|                    | Memory Treg           | 3.5 ± 2.4                                                     | 4.3 ± 1.4                         | 4.0 ± 0.3                             | 0.36    |
|                    | Tfh                   | 1.3 ± 0.7                                                     | 1.5 ± 0.6                         | 0.7 ± 0.1                             | <0.01   |
|                    | Activated Tfh         | 0.4 ± 0.3                                                     | 0.3 ± 0.3                         | 0.2 ± 0.04                            | <0.01   |
| B cells            | Naive                 | 61.9 ± 21.3                                                   | 59.4 ± 18.4                       | 65.1 ± 3.7                            | 0.6     |
|                    | IgM memory            | 12.7 ± 7.8                                                    | 13.2 ± 4.9                        | 13.2 ± 1.2                            | 0.97    |
|                    | Class-switched memory | 14.2 ± 14.2                                                   | 20.4 ± 18.0                       | 11.8 ± 2.9                            | 0.16    |
|                    | Double negative       | 11.2 ± 9.5                                                    | 7.1 ± 3.8                         | 10 ± 1.2                              | 0.13    |
|                    | Plasmablasts          | 13.5 ± 11.1                                                   | 16.5 ± 13.8                       | 6.5 ± 2.0                             | <0.01   |
| Monocytes          | Classical             | 11.4 ± 14.3                                                   | 8.6 ± 5.3                         | 10.3 ± 1.6                            | 0.64    |
|                    | Non classical         | 1.1 ± 1.0                                                     | 1.1 ± 0.6                         | 1.2 ± 0.2                             | 0.85    |
| Dendritic cells    | Myeloid               | 0.3 ± 0.4                                                     | 1.0 ± 0.6                         | 1.2 ± 0.4                             | 0.05    |
|                    | Plasmacytoid          | 0.03 ± 0.03                                                   | 0.09 ± 0.04                       | 0.1 ± 0.02                            | <0.01   |
| NK cells           | CD16+ NK cell         | 10.0 ± 8.5                                                    | 15.1 ± 13                         | 9.9 ± 2.8                             | <0.01   |
|                    | CD16- NK cell         | 7.5 ± 14.0                                                    | 1.6 ± 2.0                         | 2.8 ± 1.4                             | 0.14    |

colors were compared with healthy control

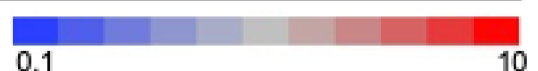

Supplement: inline-supplementary-material-2 [file inline-supplementary-material-2.pdf]
